# Supplementary material
Source: publisher site journal article supplement (https://www.dovepress.com/article/354200)
Supplement: Supplementary file 1 [file get_supplementary_file.php]

**Supplementary Materials**

**Table S1.** The score for each CENP gene was calculated by Coexpedia in the network

| Rank | Gene symbol | Score | Rank | Gene symbol | Score |
| --- | --- | --- | --- | --- | --- |
| 1 | CENPF | 498.096 | 9 | CENPM | 138.352 |
| 2 | CENPE | 345.592 | 10 | CENPL | 65.182 |
| 3 | CENPU | 308.525 | 11 | CENPO | 40.638 |
| 4 | CENPA | 244.591 | 12 | CENPH | 37.358 |
| 5 | CENPN | 233.657 | 13 | ITGB3BP(CENPR) | 14.396 |
| 6 | CENPI | 151.275 | 14 | CENPQ | 8.973 |
| 7 | CENPK | 150.115 |  |  |  |
| 8 | CENPW | 148.861 |  |  |  |


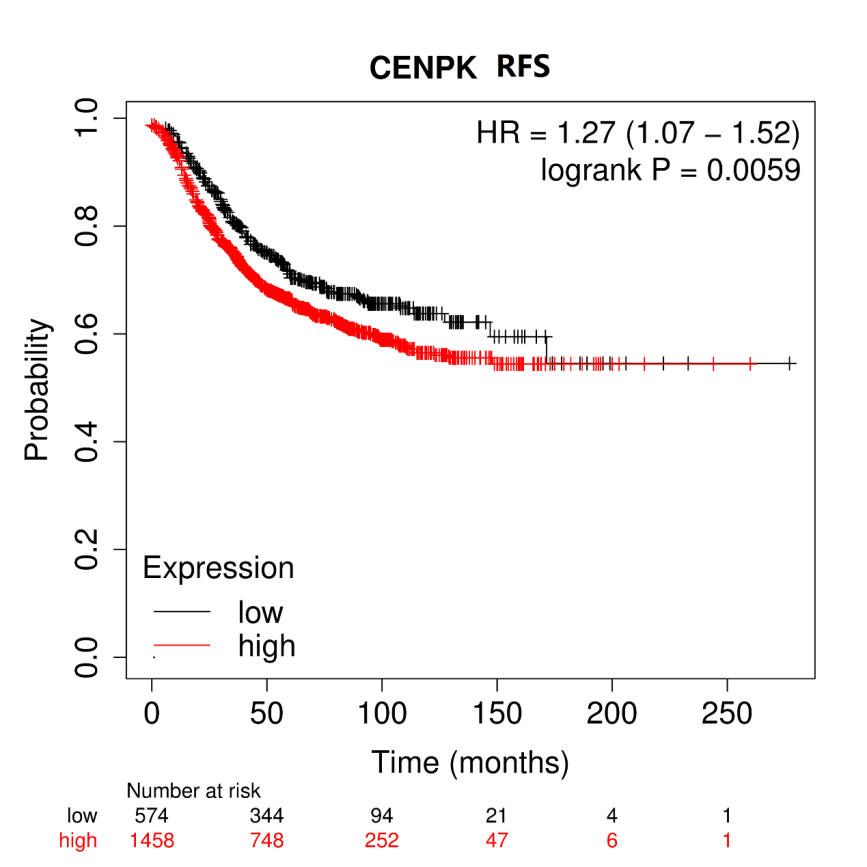


**Figure S1.** RFS according to CENPK mRNA levels in BC patients stratified by the best cutoff value (Kaplan-Meier Plotter).
